# Supplementary material
Source: PubMed Central journal article supplement (PMC3003039)
Supplement: 1005486107_pnas.201005486SI.pdf [file 1005486107_pnas.201005486SI.pdf]

# Supporting Information

Henry et al. 10.1073/pnas.1005486107

## SI Materials and Methods

**Retroviral Transduction and BMT.** The retroviral murine stem cell virus (MSCV)-ires-GFP (MiG) vector and constructs expressing either p190 or p210 Bcr-Abl in this vector were kindly provided by Zonghan Dai (Texas Tech University Health Sciences, Amarillo, TX) and Warren Pear (University of Pennsylvania, Philadelphia, PA). MSCV viruses were prepared by transient transfection of Phoenix-E cells, together with pCL-Eco or pCL-Ampho, and titered on REF52 cells using GFP as the marker so that similar multiplicities of infection for oncogenes and vector viruses were used. Harvested donor BM cells were enriched for c-Kit<sup>+</sup> cells by magnetic affinity cell sorting (Miltenyi Biotec) and then transduced in nonadhesive six-well plates using the spin-fraction technique (centrifugation at 910 × *g* for 1.5 h in the presence 8 μg/mL polybrene). Cells were then washed once with PBS and transplanted into recipient mice. Young lethally irradiated (1,000-rad split dose) BALB/c female recipients were each injected with 2 × 10<sup>6</sup> unsorted BM cells from either 2-mo-old or 22- to 24-mo-old donors (prepopulation with young or aged competitors, respectively). Before lethal irradiation, mice were starved overnight to reduce small intestinal cytotoxicity. Four days after prepopulation, 1 × 10<sup>5</sup> MSCV-transduced cells were then transplanted i.v. into recipient mice. A subset of the transduced cells was further cultured for 2 d, and the percentage of GFP<sup>+</sup> cells was determined by flow cytometry as an estimate of the initial infection efficiency. For the experiments in Fig. 2*B* and Fig. S2, recipient mice were sublethally irradiated without prepopulation to achieve a higher fraction of cells expressing Bcr-Abl or vector. For the competitive BMTs shown in Fig. 1, whole BM was mixed at the indicated ratios (based on numbers of nucleated cells) and transplanted into lethally irradiated young BALB/c recipients (1.5–3 mo of age). Competitor GFP-transgenic BM cells were from young GFP-transgenic mice (1) backcrossed >10 times into the BALB/c background. The University of Colorado Institutional Animal Care and Use Committee approved all mouse experiments.

**IL-7 Neutralization Experiments.** M25 hybridoma cells were used to generate the anti-IL-7 neutralizing antibodies. Cells were passaged in BD/Falcon 100-mm Optitlux nontissue culture-treated Petri dishes (Becton Dickinson) (10–12 mL per dish) every other day until they reached a density of 0.03–0.05 × 10<sup>6</sup> live cells/mL. Anti-IL-7 neutralizing antibody was purified from the supernatant: a HiTrap Protein G HP column was prepared (17-0404-03 or 17-0404-01; Amersham) and washed with 5 mL of filtered deionized water and then with 10 mL of filtered 1× PBS. Five liters of supernatant was collected and mixed slowly with ammonium sulfate at room temperature for 1 h. The ammonium sulfate suspension was centrifuged at 12,000 × *g* for 20 min. The supernatant was slowly decanted, and the pellet was resuspended in a total volume 10 times less than the original supernatant volume. Before putting supernatant on the column connected to an ATKA FPLC system (GE Healthcare), samples were centrifuged at 3,000 × *g* for 15 min at 4 °C. The supernatant was then loaded onto the column and pumped at a flow rate of 0.5 mL/min overnight continuously at 4 °C. On the next day, the flow-through was collected and the column was washed with 1× PBS until the OD reached baseline. Each fraction was saved for analysis. Elution buffer [10 mM glycine/HCL (pH 3.0) plus 100 mL of distilled water] was added to the column, and this fraction was collected. This sample was immediately neutralized by adding 2 μL/mL of neutralizing buffer (1.0 M Tris-OH + 0.01% sodium azide). After dialysis, samples were

assayed for protein concentration and purity via Bradford assays and SDS/PAGE analyses.

Mice were irradiated and prepopulated with young BM cells. Four days later, mice were administered young c-Kit<sup>+</sup> cells that harbored p190 Bcr-Abl. At day +1, mice were injected i.p. with control IgG (5381-10MG; Sigma) or anti-IL-7 neutralizing antibodies at 0.5 mg per mouse every 4 d for 3 wk. This dose is half of that used previously to inhibit B lymphopoiesis (2), and although IL-7-mediated signaling was perturbed (Fig. 3), pro-B cells to mature B cells were still generated. Mice were killed, and experiments were performed as described in Fig. 3.

**Flow Cytometric Analysis.** Single-cell suspensions were plated in 96-well round-bottomed plates and washed in FACS buffer [3% FBS + 1× PBS + 2 mM EDTA (vol/vol)]. Following the wash, cells were stained in 50 μL of antibody solution (1:100 dilution of each antibody) for 30 min to 1 h on ice. Cells were washed once with 200 μL of FACS buffer and resuspended in 400 μL of FACS buffer for flow cytometric analysis. The following PharMingen antibodies against mouse were used: phycoerythrin (PE)-linked anti-B220, anti-CD43, anti-CD4, anti-CD8, anti-Ter119, anti-CD48, and anti-MAC-1; PE-Cy7-linked anti-MAC-1 and anti-IL-7Rα; allophycocyanin-linked anti-B220, anti-Thy1.2, anti-CD117, anti-Sca1, and anti-CD150; and PE-Cy7-linked antibiotin. PE-Cy7-conjugated anti-Mac1, anti-CD93, anti-CD19, anti-IL-7Rα, streptavidin-conjugated PE-Cy7, and biotin-conjugated anti-CD93 were purchased from Ebiosciences. Flow cytometry analysis was performed on a Cyan, Cytomics FC 500, or Cell Lab Quanta SC (Beckman Coulter) flow cytometer.

For detection of intracellular phosphorylated proteins, BM cells were stained for surface markers as described above (cells were kept at 0–4 °C for the entire procedure). Sodium orthovanadate was added to the staining solution at 150 μM to inhibit tyrosine phosphatases. After washing with FACS buffer, the cells were resuspended in 50 μL of Reagent A (Fixation Media, catalog no. GAS001; Invitrogen) and incubated for 30 min on ice or overnight at 4 °C. One hundred microliters of FACS buffer was added per sample, and the cells were pelleted, resuspended in 100 μL of ice-cold 90% methanol (vol/vol), and incubated for 20 min on ice. The cells were then centrifuged, washed in 100 μL of FACS buffer, and resuspended in 40 μL of Reagent B (catalog no. GAS002; Invitrogen) with 10 μL of PE-conjugated antibody specific for a phosphorylated (P-) protein or the appropriate isotype control. The following PE-linked antibodies were used: P-Akt (P-T308, catalog no. 558275), P-Akt (P-S473, catalog no. 560378), P-STAT3 (P-Y705, catalog no. 612569), P-STAT5 (P-Y694, catalog no. 612567), P-Erk (P-T202/P-Y204, catalog no. 612566), and control (rat IgG2b, catalog no. 556925). Following a 1-h incubation on ice, the cells were washed in 100 μL of FACS buffer, centrifuged, and resuspended in 400 μL of FACS buffer and analyzed on the Cyan cytometer. This protocol was modified from the one provided by Kent Teague (3).

**In Vitro B-Progenitor Cultures.** c-Kit-selected BM progenitors from old or young BALB/c mice were cultured on OP9 stromal cells supplemented with 1 ng/mL IL-7 and 10 ng/mL Flt3 ligand as previously described (4). Cell expansion was monitored by flow cytometry for GFP<sup>+</sup>B220<sup>+</sup> cells in the cultures. The coefficient of selection was calculated by dividing the fold change in GFP percentages by the number of population doublings (PDs): (GFP<sub>1</sub>/GFP<sub>0</sub>)/(PD<sub>1</sub> – PD<sub>0</sub>). For the experiment shown in Fig. S6C, Bcr-Abl-expressing progenitors were diluted with untransduced pro-





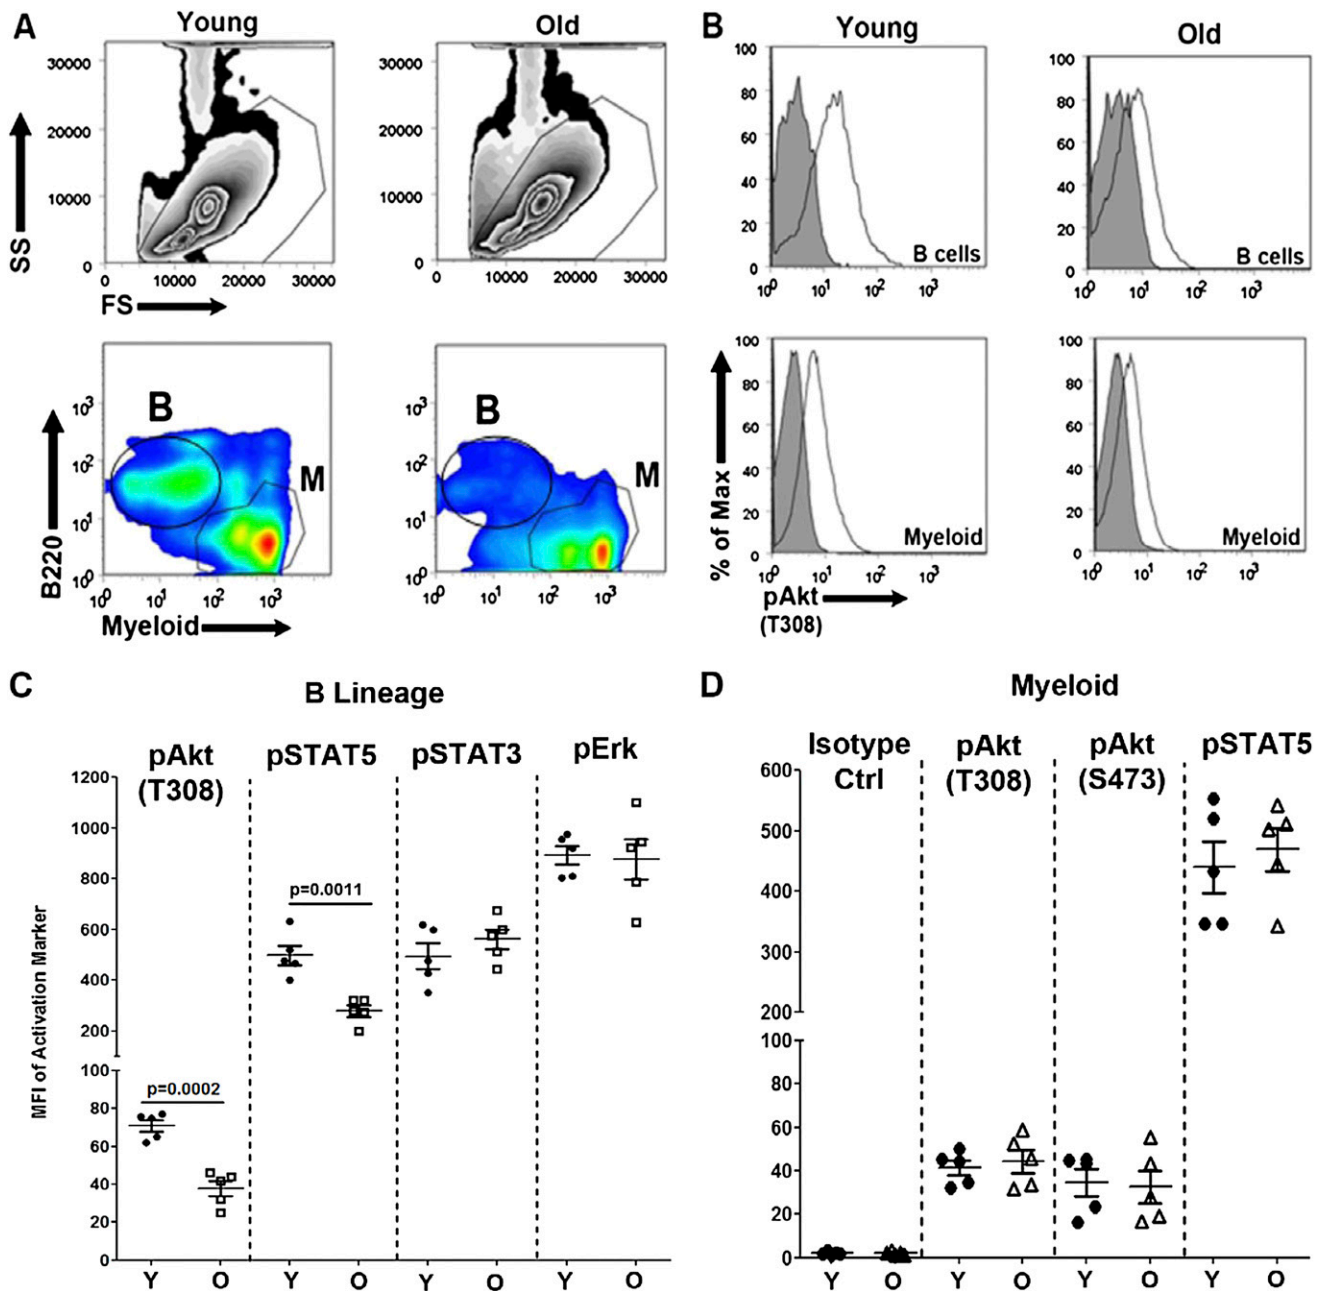

**Fig. 52.** Activation of Akt and STAT5 is reduced in old BM. BM was isolated from young (Y) and old (O) mice; stained with antibodies against B220 and Mac1; and processed for detection of intracellular P-Akt (T308 or S473), P-STAT5, and P-Erk by flow cytometry. (A and B) Gating strategy used for the quantitation of mean fluorescence intensity (MFI) shown. The "B" and "M" gates in A were used for P-Akt detection in the B-cell and myeloid lineages, respectively, as shown in B. (C) Detection of P-Akt, P-STAT5, P-STAT3, and P-Erk in cells gated on the B220<sup>+</sup> B-lineage population negative for other lineage markers (Mac1, Ter119, and CD3) is shown. (D) Detection of P-Akt and P-STAT5 in cells gated on the B220<sup>neg</sup> population positive for other lineage markers (Mac1, Ter119, and CD3) is shown. Greater than 90% of these gated cells will be myeloid (erythroid and other myeloid lineages).

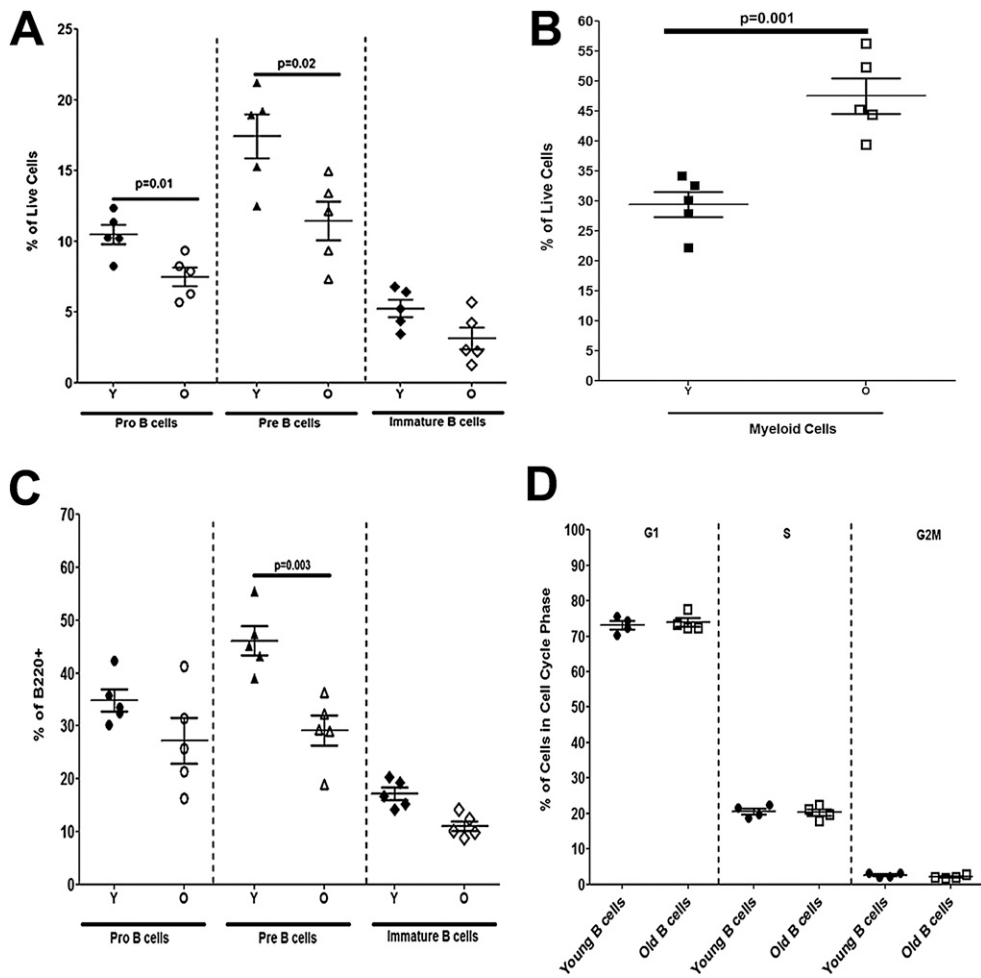

**Fig. S3.** Reduced pro-B cell and pre-B cell frequencies in old BM. The percentage of pro-B and pre-B cells is reduced in the BM of old mice. BM was stained with antibodies against B220, CD93, Mac1, and CD43, and the percentages of nucleated myeloid cells ( $Mac1^{pos}B220^{neg}CD93^{neg}CD43^{neg}$ ), pro-B cells ( $B220^{med}CD93^{+}CD43^{+}Mac1^{neg}$ ), pre-B/immature B cells ( $B220^{med}CD93^{+}CD43^{neg}Mac1^{neg}$ ), or mature B cells ( $B220^{high}CD93^{neg}CD43^{neg}Mac1^{neg}$ ) within total live BM (A and B) or B220<sup>+</sup> pools (C) are graphed. (D) B-cell progenitors in young (Y) and old (O) BM do not exhibit differences in cell cycle profiles. BM from young and old mice was stained with anti-B220-FITC, washed, permeabilized, and stained with propidium iodide to determine DNA content per cell. The fraction of cells in the indicated cell cycle stages is graphed. BM, bone marrow.











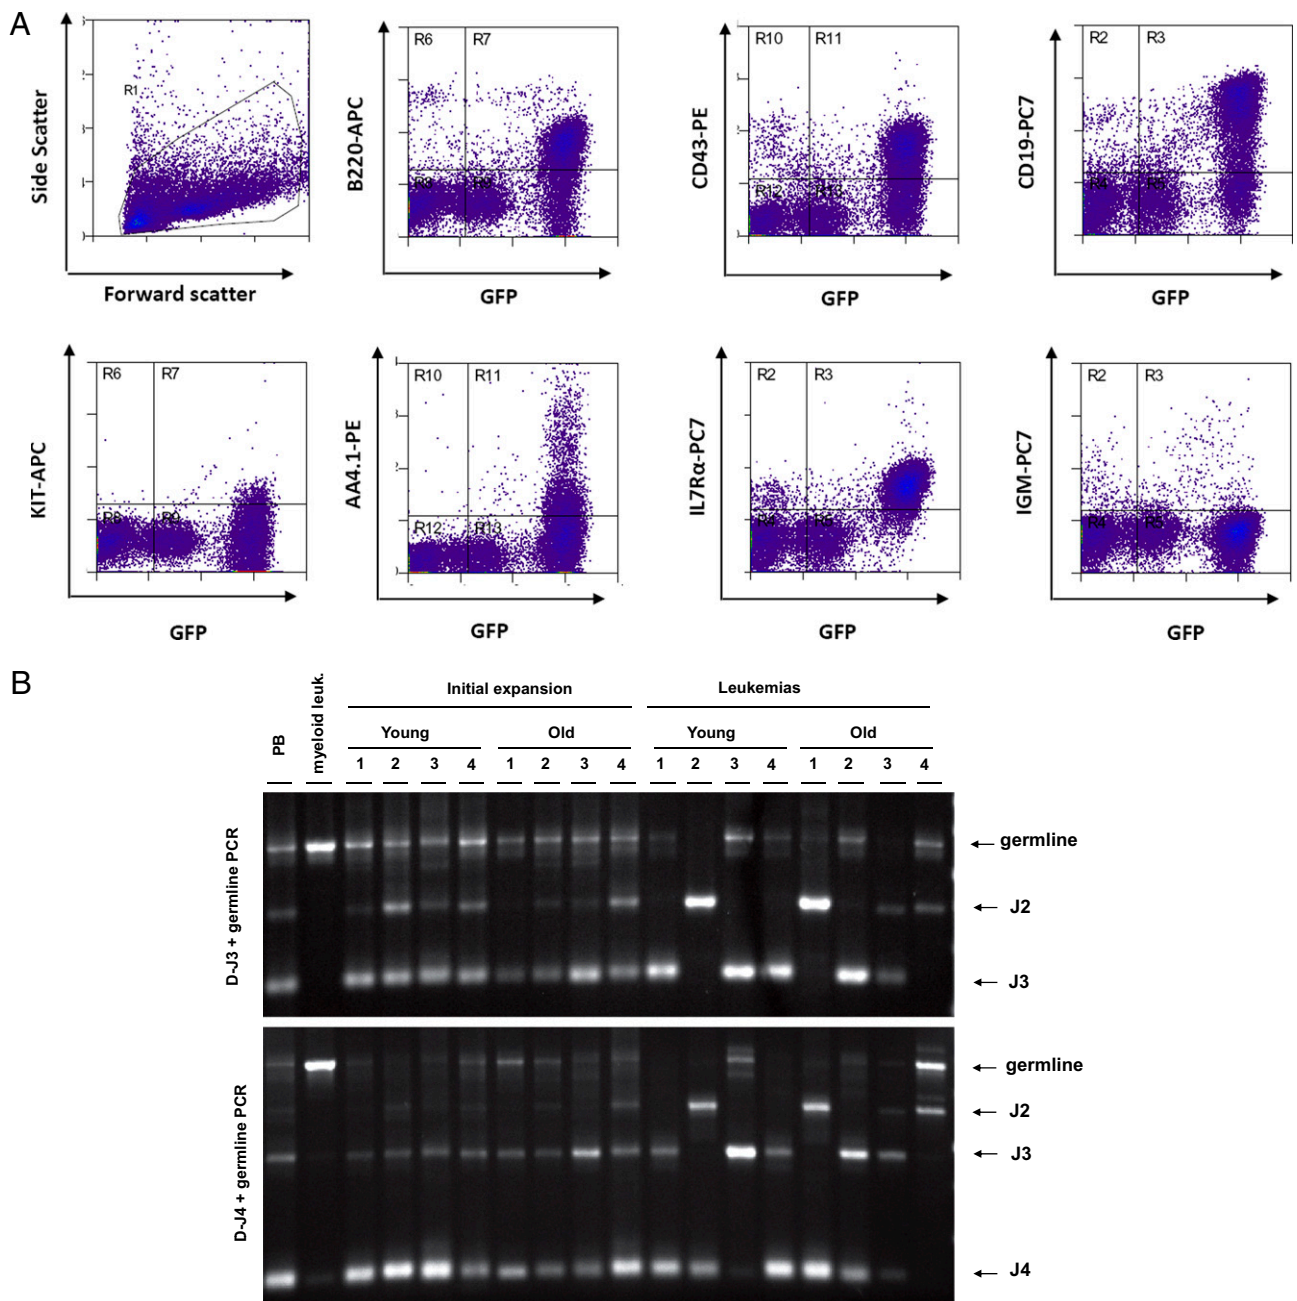

**Fig. S8.** Although the initial expansion of Bcr-Abl-expressing cells is polyclonal, most leukemias that develop in Bcr-Abl-expressing young or old progenitors are pro-B cell-like and monoclonal. (A) Most leukemias that developed in recipients of p190 or p210 Bcr-Abl-transduced BM cells (with the exception of p210-transduced cells in recipients with *Rag2*<sup>-/-</sup> competitors) exhibited a pro-B-like phenotype. An example of flow cytometric analysis of leukemia from a recipient of p190-transduced old cells with old competitor BM is shown, but similar phenotypes were observed for other B-lineage leukemias. The antibodies used to detect the indicated cell surface markers are shown on the y axis, and GFP expression is depicted on the x axis. A summary of the lineage types for leukemias that developed in all groups shown in Fig. 4, is presented in Table S1. (B) D-J rearrangements for the  $\mu$ -heavy chain were analyzed by PCR using D and J3 primers or D and J4 primers for either Bcr-Abl<sup>+</sup>B220<sup>+</sup> cells isolated from mice during early expansions (~3 wk) or from leukemias that developed in transplanted mice (from young or old progenitors). Peripheral blood (PB) is used as a control, because all possible D-J rearrangements are present. As another control, Bcr-Abl-initiated myeloid leukemias only exhibit germline configurations. Each of the PCR reactions has two forward primers and one reverse primer. Forward primers are a degenerate primer for D minigene that is specific to 9 of 10 murine D minigenes (DH primer) and a germline (Mu0) primer. The reverse primer is specific for J3 (Upper) or J4 (Lower). DJ rearrangement results in a loss of amplification product with Mu0 and generation of a product with DH primer.

**Table S1. Leukemia typing**

| Bcr-Abl p190           | B-cell lymphoid | Myeloid | T-cell lymphoid | Mixed B/M |
|------------------------|-----------------|---------|-----------------|-----------|
| Young competition      | 3               | 1       | —               | —         |
| Old competition        | 9               | 1       | —               | 1         |
| R $\mu$ KI competition | 3               | —       | —               | —         |
| Rag competition        | 4               | —       | —               | —         |
| Young competition      | 6               | 1       | —               | 1         |
| Old competition        | 9               | 4       | 1               | 1         |
| R $\mu$ KI competition | 3               | —       | —               | 1         |
| Rag competition        | 2               | 8       | 1               | 1*        |

Leukemia typing was performed as described in Fig. S8A, except that antibodies recognizing the myeloid markers GR-1 and Mac-1 were also included. The leukemias were typed as “B-cell” or “myeloid” if over half of GFP<sup>+</sup> cells were B220<sup>+</sup> or Mac-1/GR-1<sup>+</sup>. Mixed B-cell/myeloid (B/M) leukemias contained at least 25% of both B-cell and myeloid markers.

\*B-cell and myeloid markers were expressed on the same leukemia cells for this mixed B/M leukemia (whereas for other mixed leukemias, these markers were expressed on different leukemia cells).
